# Supplementary material for: Two cases of successful simple chest closure without cavity reduction after open-window thoracotomy for empyema: A case report
Source: Research Square preprint supplement (doi:10.21203/rs.3.rs-6547482/v1), 2025-05-09
Supplement: Supplementary file 1 [file 03c6fcead486b02a89046513.xlsx]

## Sheet: Sheet1
		WBC	CRP
	Case1	7500/µL	3.08mg/dL
	Case2	5200/µL	0.86mg/dL
